# Supplementary material for: Label-free detection of cell-contractile activity with lipid nanotubes
Source: Royal Society of Chemistry journal article supplement (doi:10.1039/c2ib20202f), 2012-11-21
Supplement: c2ib20202f.pdf [file c2ib20202f.pdf]

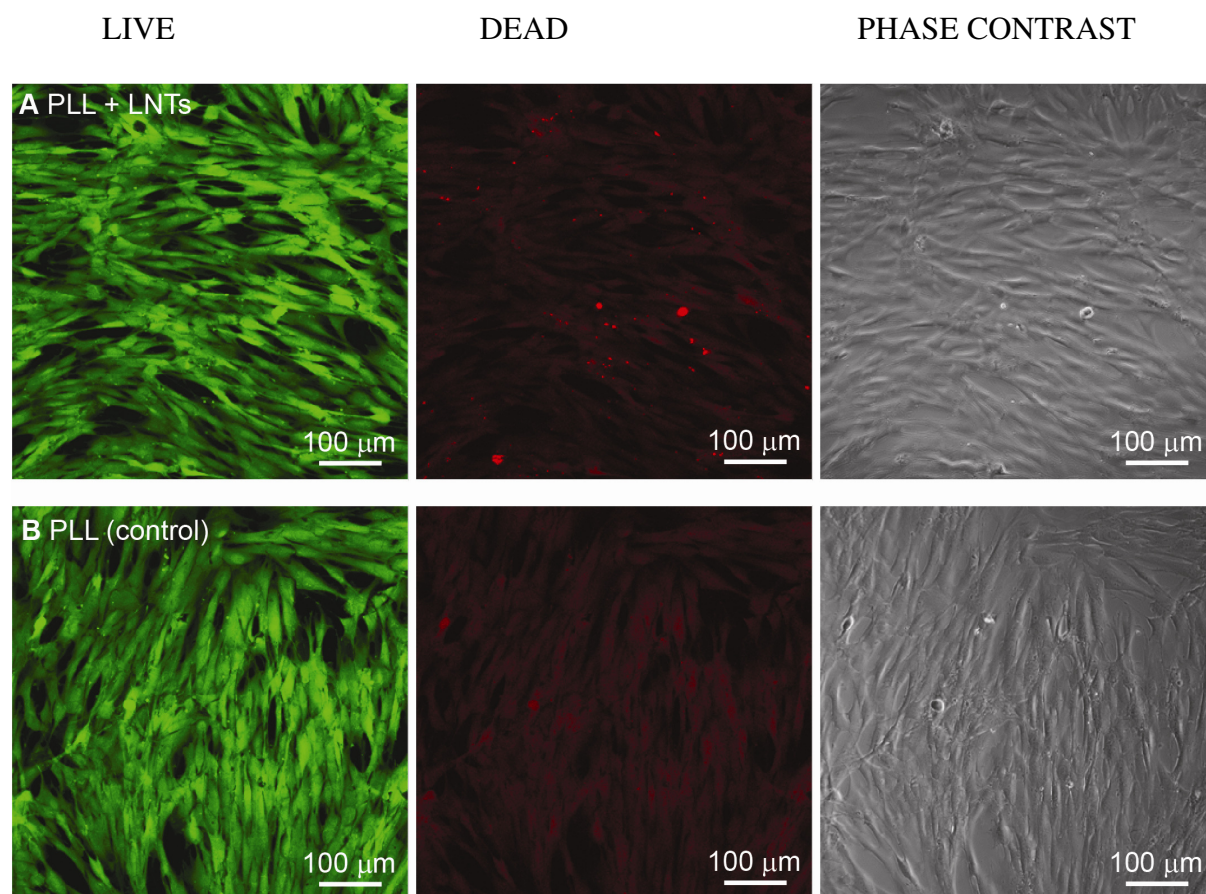

**Supplementary Figure S1** - Viability test on force detector substrates. Fibroblasts were seeded on PLL coated glass substrates decorated with LNTs (**A**) or on control PLL coated glass (**B**). The CytoSelect Cell Viability and Cytotoxicity Assay Kit (Cell Biolabs, Catalog Number CBA-240) was used to detect the number of living (i.e. green stained, leftmost panels) and dead (i.e. red stained, middle panels) cells after three days in culture. Transmission images of the cell monolayers are provided in the rightmost panels.
